# Supplementary material
Source: Springer Nature journal article supplement (https://www.springermedizin.de/resource/supplementary/12884_2011_453_MOESM2_ESM.pdf/9457698)
Supplement: MOESM2 [file 9457698]

**Socioeconomic & Demographic Factors**

- Low SES
- Low levels of maternal education
- Early marriage

**Sociocultural & Structural Factors**

- Women's lack of decision-making power
- Easy access to non-certified providers
  - Non-medical disease perceptions
  - Mistrust of hospitals
- Expectation of women enduring pain

**Delays to Seeking Certified Medical Care**

- Women seen by non-certified providers
  - Providers recognized inability to handle cases
- Families dissatisfied with treatment
- Women's situation became dire

**Referral Linkages**

- Village doctors and dais provided advice for referral
- Male relatives used mobile phones to coordinate transport and money

**How Death was Averted**

- Women were taken to board-certified healthcare providers
- Women received emergency care
